# Supplementary material
Source: HighWire-hosted journal article supplement (https://gut.bmj.com/content/68/12/2170)
Supplement: inline-supplementary-material-1 [file inline-supplementary-material-1.pdf]

Supplemental Table 1

|                  | Scheduled  | On-demand  | p-value |
|------------------|------------|------------|---------|
| DHC              | 60 (59.4%) | 47 (60.3%) | n.s.    |
| Hilus            | 18 (17.8%) | 16 (20.5%) | n.s.    |
| D.hep.sin./dext. | 23 (22.8%) | 15 (19.2%) | n.s.    |
