# Supplementary material
Source: HighWire-hosted journal article supplement (https://gut.bmj.com/content/68/12/2170)
Supplement: inline-supplementary-material-2 [file inline-supplementary-material-2.pdf]

Supplemental Table 2

| Stadium | Scheduled (n=48) | On-demand (n=89) |
|---------|------------------|------------------|
| I       | 14 (29.2%)       | 25 (28.1%)       |
| II      | 19 (39.6%)       | 30 (33.7%)       |
| III     | 9 (18.8%)        | 18 (20.2%)       |
| IV      | 6 (12.5%)        | 16 (18.0%)       |
