# Supplementary material
Source: HighWire-hosted journal article supplement (https://gut.bmj.com/content/68/12/2170)
Supplement: inline-supplementary-material-3 [file inline-supplementary-material-3.pdf]

**Supplemental Table 3**

|                                    | Scheduled | On-demand |
|------------------------------------|-----------|-----------|
| <b>No DS at any time</b>           |           |           |
| Diagnostic                         | 6 (2-17)  | 1 (1-3)   |
| Therapeutic                        | Na        | Na        |
| <b>DS at first diagnosis</b>       |           |           |
| Diagnostic                         | 13 (3-23) | 1 (1-4)   |
| Therapeutic                        | 5 (2-17)  | 2 (1-8)   |
| <b>DS during course of disease</b> |           |           |
| Diagnostic                         | 12 (2-27) | 1 (1-3)   |
| Therapeutic                        | 6 (1-19)  | 2 (1-11)  |
