# Supplementary material
Source: HighWire-hosted journal article supplement (https://gut.bmj.com/content/68/12/2170)
Supplement: inline-supplementary-material-4 [file inline-supplementary-material-4.pdf]

# Supplemental Table 4

A

|                      | Scheduled  | On-demand    | p-value     |
|----------------------|------------|--------------|-------------|
| AP: Baseline (n=286) | 267.0±27.8 | 313.0 ± 57.6 | 0.1         |
| AP: 1year (n=233)    | 188.0±22.4 | 284.5±38.4   | 0.2         |
| AP: 2 years (n=219)  | 222.0±26.8 | 342.0±70.4   | 0.1         |
| AP: 3 years (n=200)  | 212.5±23.5 | 304±48.7     | 0.1         |
| AP: 4 years (n=197)  | 233.5±28.3 | 285.0±67.4   | 0.3         |
| AP: 5 years (n=188)  | 235.0±24.6 | 377±69.1     | <b>0.01</b> |

B

|                       | Scheduled  | On-demand  | p-value |
|-----------------------|------------|------------|---------|
| GGT: Baseline (n=285) | 316.0±41.9 | 392.5±31.2 | 0.3     |
| GGT: 1year (n=241)    | 208.5±31.9 | 159.0±25.2 | 0.6     |
| GGT: 2 years (n=220)  | 146.0±24.6 | 134.0±28.1 | 0.8     |
| GGT: 3 years (n=183)  | 158.0±35.8 | 144.3±38.9 | 0.8     |
| GGT: 4 years (n=176)  | 154.0±32.3 | 156.8±41.5 | 0.9     |
| GGT: 5 years (n=188)  | 168.0±32.5 | 164.5±72.2 | 0.9     |

C

|                             | Scheduled | On-demand | p-value     |
|-----------------------------|-----------|-----------|-------------|
| Bilirubin: Baseline (n=282) | 0.8±0.2   | 0.8±0.2   | 0.9         |
| Bilirubin: 1year (n=231)    | 0.9±0.3   | 1.4±0.6   | 0.3         |
| Bilirubin: 2 years (n=219)  | 0.8±0.3   | 0.9±0.3   | 0.8         |
| Bilirubin: 3 years (n=205)  | 0.7±0.2   | 1.2±0.3   | <b>0.02</b> |
| Bilirubin: 4 years (n=199)  | 0.7±0.2   | 1.4±0.4   | <b>0.04</b> |
| Bilirubin: 5 years (n=207)  | 1.0±0.2   | 1.4±0.5   | <b>0.02</b> |
