# Supplementary material
Source: HighWire-hosted journal article supplement (https://gut.bmj.com/content/68/12/2170)
Supplement: inline-supplementary-material-5 [file inline-supplementary-material-5.pdf]

**Supplemental Table 5**

|                                      | Scheduled  | On-demand  | p-value      |
|--------------------------------------|------------|------------|--------------|
| Recurrent cholangitis                | 23 (17.3%) | 53 (34.6%) | <b>0.001</b> |
| Esophageal varices                   | 28 (21.1%) | 49 (32.0%) | <b>0.03</b>  |
| Hepatic decompensation               | 13 (9.8%)  | 34 (22.2%) | <b>0.005</b> |
| Ascites                              | 9 (6.8)    | 20 (13.1%) | 0.08         |
| Variceal bleeding                    | 6 (4.5%)   | 17 (10.5%) | <b>0.04</b>  |
| Hepatic encephalopathy               | 4 (3.0%)   | 5 (3.3%)   | 0.9          |
| Hepatorenal syndrome                 | 0 (0.0%)   | 3 (2.0%)   | 0.1          |
| Time to first decompensation (years) | 13.5±6.7   | 9.8±7.8    | <b>0.04</b>  |
