# Supplementary material
Source: HighWire-hosted journal article supplement (https://gut.bmj.com/content/68/12/2170)
Supplement: inline-supplementary-material-6 [file inline-supplementary-material-6.pdf]

**Supplemental Table 6**

|                                       | Scheduled | On-demand |
|---------------------------------------|-----------|-----------|
| PEP: first ERCP                       | 5 (3.8%)  | 3 (2.0%)  |
| PEP: follow-up ERCP                   | 3 (2.3%)  | 2 (1.3%)  |
| Cholangitis: first ERCP               | 2 (1.5%)  | 1 (0.7%)  |
| Cholangitis: follow-up ERCP           | 3 (2.3%)  | 2 (1.3%)  |
| Bile duct perforation: first ERCP     | 0 (0.0%)  | 1 (0.7%)  |
| Bile duct perforation: follow-up ERCP | 0 (0.0%)  | 0 (0.0%)  |
